# Supplementary material for: Features of the Opportunistic Behaviour of the Marine Bacterium Marinobacter algicola in the Microalga Ostreococcus tauri Phycosphere
Source: MDPI journal article supplement (doi:10.3390/microorganisms9081777), 2021-08-20
Supplement: s1 [file s1]

## Supplementary Material

### Text S1

#### **Material and Methods for the distinction of *M. algicola* OT from other bacterial communities in *O. tauri* RCC4221 cultures.**

*O. tauri* RCC4221 cultures used for coculture experiments were not axenic despite the use of antibiotic treatments. At the lowest bacterial contamination (around 3%), *O. tauri* RCC4221 culture was diluted to  $10^6$  cells.mL<sup>-1</sup> in F/2-ESAW medium and distributed into several 50 mL sterile flasks. Co-culture experiments were performed for a total duration of 30 days. To test the effects of *M. algicola* OT on *O. tauri* RCC4221, different final bacterial concentrations ( $5 \times 10^6$  and  $20 \times 10^6$  *M. algicola* OT cells.mL<sup>-1</sup>) were added to *O. tauri* culture RCC4221. A control (without the addition of *M. algicola* OT to the *O. tauri* RCC4221 culture) allowed us to visualize the growth pattern of the few remaining bacteria (fewer than  $3 \times 10^5$  cells.mL<sup>-1</sup>) after axenization was not totally efficient. *M. algicola* OT cells were distinguished easily from other bacterial communities in *O. tauri* RCC4221 cultures thanks to the former having weaker fluorescence signals after SYBR Green labelling than the other bacteria.

### Text S2

#### **Material and Methods for the evaluation of *M. algicola* OT quorum-sensing capacities**

##### **For the detection of AHLs:**

*E. coli* MT102 and *P. putida* F117 were cultivated overnight with continuous shaking (200 rpm) at 37 °C in lysogeny broth (LB) medium developed by Bertani (Sigma L3022) and supplemented with tetracycline (25 µL.mL<sup>-1</sup>) and at 30 °C in LB

supplemented with gentamicin ( $20 \mu\text{L}.\text{mL}^{-1}$ ), respectively. An overnight culture of each biosensor strain was inoculated in fresh LB medium (dilution 1/50) and dispensed into 96-well microplates ( $150 \mu\text{L}.\text{well}^{-1}$  for bacterial supernatant evaluation and  $180 \mu\text{L}.\text{well}^{-1}$  for extracts or fractions). To evaluate the ability of *M. algicola* OT to produce AI-1, culture supernatants were collected after centrifugation (10 min at 10,000 rpm) and added to microplate wells containing the biosensor strains ( $50 \mu\text{L}.\text{well}^{-1}$ , in triplicate). Microplates were incubated without shaking at 30 °C and 37 °C, depending on the optimum growth temperature of the selected biosensor strain. After 0, 5 and 24 h of incubation, fluorescence was determined with a Victor1420 Multilabel Counter (Perkin-Elmer) at an excitation wavelength of 485 nm and a detection wavelength of 535 nm. The optical density (OD) at 620 nm was also measured to monitor biosensor cell growth. Negative controls were biosensor cultures with sterile LB medium and without extract. Biosensor cultures with added commercial AHLs (C6-HSL for *E. coli* MT102 and oxo-C10-HSL for *P. putida* F117) were used as positive controls.

#### **For the detection of AI-2:**

Briefly, a *V. harveyi* reporter strain was grown at 30 °C in autoinducer bioassay (AB) medium. The overnight culture was then diluted 1:5,000 into fresh medium, and 180  $\mu\text{L}$  of the diluted cells were added to wells containing 20  $\mu\text{L}$  of the culture supernatants of the bacteria to be tested for AI-2 production. The 96-well plates were incubated at 30 °C. Every hour, luminescence was measured using a Victor1420 Multilabel Counter (Perkin-Elmer) until the medium control sample produced the least amount of light. AI-2 production is reported as the fold induction of the reporter strain divided by the background when only medium was added to the reporter. All assays were performed in duplicate.

Protocols are referenced in Tourneroché et al. (2019) and Doberva et al. (2017)

Doberva M, Stien D, Sorres J, Hue N, Sanchez-Ferandin S, Eparvier V, Ferandin Y, Lebaron P, Lami R (2017) Large diversity and original structures of acyl-homoserine lactones in strain MOLA 401, a marine *Rhodobacteraceae* bacterium. *Frontiers in Microbiology* 8:1152

Tourneroché A, Lami R, Hubas C, Blanchet E, Vallet M, Escoubeyrou K, Paris A, Prado S (2019) Bacterial-fungal interactions in the kelp endomicrobiota drive autoinducer-2 quorum sensing. *Frontiers in Microbiology* 10:1693.

Figure S1

A

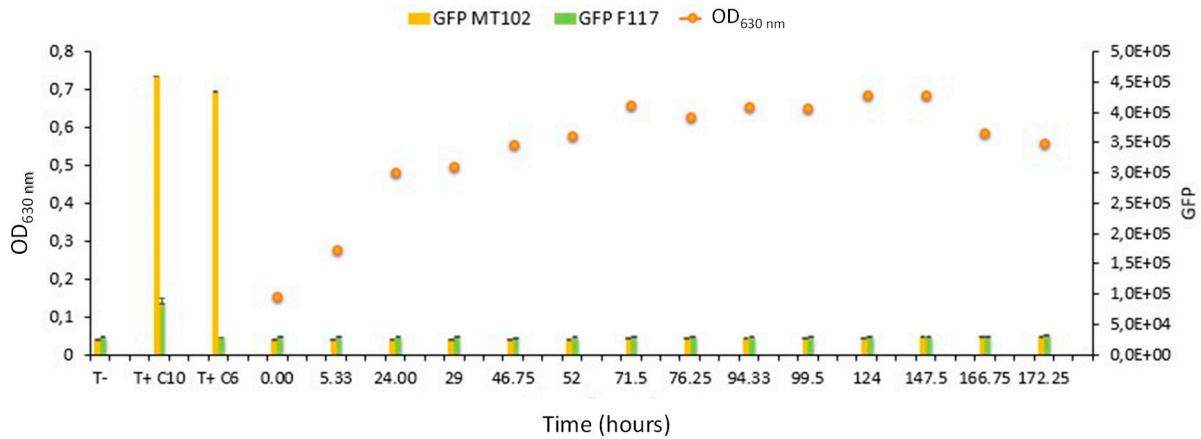

B

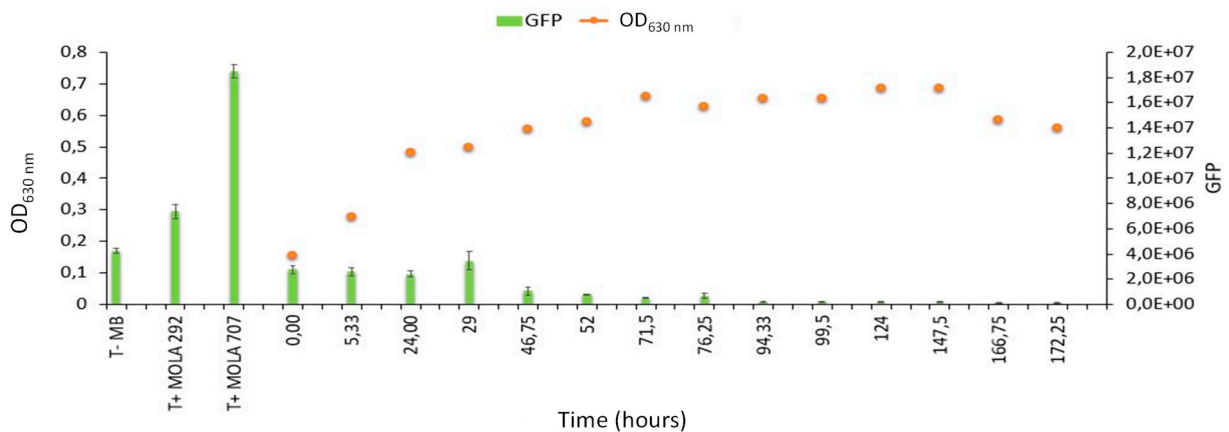

Figure S1: No AI-1 (Figure S2A) or AI-2 (Figure S2B) production by *M. algicola* OT. (A) AI-1 detection test of short chains by the *E. coli* MT102 biosensor (GFP MT102) and of long chains by *P. putida* F117 (GFP F117) during *M. algicola* growth (T- = marine broth only; T+C10 and T+C6 = supernatants from *Roseovarius tolerans* culture). The T + C10 and T + C6 control results show that the *P. putida* strain F117 specifically detects the long-chain, 10-carbon (T + C10) AI-1 and that *E. coli* MT102 detects the AI-1 long and short chains. For the negative control (T-) and the control T + C6 (chain containing 6 carbons, short chain) AI-1, the expression levels of GFP were not significantly different. The *M. algicola* strain does not produce type 1 AIs, regardless of whether they have long or short chains. The emission intensity of GFP

was equal to that of the negative control (T-) for the two biosensors used. (B) AI-2 detection test by the *Vibrio harveyi* MM32 biosensor along *M. algicola* (T- = marine broth only; T+ MOLA 292 and T+ MOLA 707 = supernatants from the MOLA station. The results also show that the *M. algicola* OT strain does not produce type 2 AIs. However, we noticed that the production of AI-2 differed with the time of growth, which did not occur in the two previous experiments.

**Table S1: BWA alignment results of reference QS genes with raw genomics reads from 19 *O. tauri* (and its phycosphere) line cultures.** From these 19 independent lines which were endpoints diluted through serial subcultures [41], all the cultivable bacteria in solid media were *M. algicola* [25]. Here are presented the 24 most abundant quorum-sensing genes in the cultures. No gene from *Marinobacter* species was found.

| <i>Most abundant quorum-sensing genes</i> | Putative organism origin           | Uniprot accession number |
|-------------------------------------------|------------------------------------|--------------------------|
| <i>luxI</i>                               | <i>Burkholderia multivorans</i>    | AAG61138                 |
| <i>luxI</i>                               | <i>Sphingobium japonicum</i>       | BAI95305                 |
| <i>luxS</i>                               | <i>Vibrionales</i> bacterium       | EDK27865                 |
| <i>luxI</i>                               | <i>Burkholderia oklahomensis</i>   | WP_010119585             |
| <i>luxI</i>                               | <i>Burkholderia thailandensis</i>  | YP439001                 |
| <i>luxI</i>                               | <i>Methylobacterium extorquens</i> | ABI74777                 |
| <i>luxI</i>                               | <i>Burkholderia pseudomallei</i>   | YP_111576                |
| <i>luxI</i>                               | <i>Ralstonia syzygii</i>           | CCA85665                 |
| <i>luxI</i>                               | <i>Burkholderia vietnamiensis</i>  | ACP43465                 |
| <i>luxI</i>                               | <i>Burkholderia mallei</i>         | YP_106161                |
| <i>hdtS</i>                               | <i>Bradyrhizobium</i> sp.          | WP_009025797             |
| <i>luxI</i>                               | <i>Burkholderia pseudomallei</i>   | YP_111576                |
| <i>luxI</i>                               | <i>Caulobacter</i> sp.             | WP007662486              |
| <i>luxI</i>                               | <i>Mesorhizobium alhagi</i>        | WP008838483              |
| <i>hdtS</i>                               | <i>Pseudomonas aeruginosa</i>      | ZP04931075               |
| <i>hdtS</i>                               | <i>Alcaligenes faecalis</i>        | WP_003803484             |
| <i>luxI</i>                               | <i>Ruegeria conchae</i>            | WP_010442847             |
| <i>hdtS</i>                               | <i>Pseudomonas synxantha</i>       | EIK72202                 |
| <i>luxI</i>                               | <i>Burkholderia multivorans</i>    | EJO60396                 |
| <i>hdtS</i>                               | <i>Pseudomonas psychrotolerans</i> | ADG45384                 |
| <i>hdtS</i>                               | <i>Teredinibacter turnerae</i>     | WP_018416032             |
| <i>hdtS</i>                               | <i>Phaeospirillum molischianum</i> | WP_002725490             |
| <i>luxI</i>                               | <i>Erwinia tracheiphila</i>        | WP_016192680             |
| <i>luxI</i>                               | <i>Collinsella_aerofaciens</i>     | EBA38517                 |

**Table S2: Quorum-sensing genes screening in 21 *Marinobacter* complete genomes (accession numbers in the NCBI).** Only *luxR* is present with high e-value in the annotation of some genomes for which the blast hit was “1-acyl-sn-glycerol-3-phosphate acyltransferase” (bold sign). *hdtS* was present is a lesser extent with not strong e-value (normal sign).

| <i>Marinobacter</i> species               | Accession number | <i>luxI</i> | <i>luxR</i> | <i>luxS</i> | <i>luxM</i> | <i>vanM</i> | <i>ainS</i> | <i>hdtS</i> |
|-------------------------------------------|------------------|-------------|-------------|-------------|-------------|-------------|-------------|-------------|
| <i>M. adhaerens</i> HP15                  | PRJNA224116      | -           | ✓           | -           | -           | -           | -           | -           |
| <i>M. algicola</i> DG893                  | PRJNA19321       | -           | ✓           | -           | -           | -           | -           | -           |
| <i>M. antarcticus</i> CGMCC 1.10835       | PRJEB18348       | -           | -           | -           | -           | -           | -           | -           |
| <i>M. daepoensis</i> DSM 16072            | PRJNA195792      | -           | ✓           | -           | -           | -           | -           | -           |
| <i>M. excellens</i> HL-55                 | PRJNA195885      | -           | ✓           | -           | -           | -           | -           | -           |
| <i>M. hydrocarbonoclasticus</i> ATCC49840 | PRJEA91119       | -           | ✓           | -           | -           | -           | -           | ✓           |
| <i>M. lipolyticus</i> SM19                | PRJNA196694      | -           | ✓           | -           | -           | -           | -           | ✓           |
| <i>M. lutaoensis</i> T5054                | PRJNA357186      | -           | -           | -           | -           | -           | -           | ✓           |
| <i>M. manganoxydans</i> Mnl7-9            | PRJNA73991       | -           | ✓           | -           | -           | -           | -           | ✓           |
| <i>M. mobilis</i> CGMCC 1.7059            | PRJEB16583       | -           | -           | -           | -           | -           | -           | ✓           |
| <i>M. nanhaiticus</i> D15-8W              | PRJNA193181      | -           | ✓           | -           | -           | -           | -           | ✓           |
| <i>M. nitratreducens</i> AK21             | PRJNA178951      | -           | ✓           | -           | -           | -           | -           | -           |
| <i>M. pelagius</i> CGMCC 1.6775           | PRJEB17496       | -           | -           | -           | -           | -           | -           | ✓           |
| <i>M. persicus</i> IBRC-M 10445           | PRJEB17403       | -           | -           | -           | -           | -           | -           | -           |
| <i>M. psychrophilus</i> 20041             | PRJNA284323      | -           | -           | -           | -           | -           | -           | -           |
| <i>M. salarius</i> R9SW1                  | PRJNA227392      | -           | ✓           | -           | -           | -           | -           | -           |
| <i>M. salinus</i> Hb8                     | PRJNA349097      | -           | ✓           | -           | -           | -           | -           | ✓           |
| <i>M. santoriniensis</i> NKSG1            | PRJNA188242      | -           | -           | -           | -           | -           | -           | ✓           |
| <i>M. segnicrescens</i> CGMCC 1.6489      | PRJEB17056       | -           | ✓           | -           | -           | -           | -           | -           |
| <i>M. subterranei</i> JG233               | PRJNA284629      | -           | ✓           | -           | -           | -           | -           | ✓           |
| <i>M. zhejiangensis</i> CGMCC 1.7061      | PRJEB17480       | -           | -           | -           | -           | -           | -           | -           |
